# Supplementary material
Source: publisher site journal article supplement (http://static.cambridge.org/content/id/urn:cambridge.org:id:article:S0899823X19000679/resource/name/S0899823X19000679supp001.docx)
Supplement: Supplementary file 1 [file S0899823X19000679supp001.docx]

**Supplemental Table**

Interview questions used to prompt discussions with patients and Environmental Associates.

| Environmental Associates | How easy or difficult was your experience in learning how to use Highlight®?  Compared with use of the standard bleach product, what are some aspects of Highlight® which you like or dislike? |
| --- | --- |
| Patients | 1. How would you describe your comfort level with the visual and smell aspects of the highlighted surfaces in the room? 2. Do you feel as if the use of Highlight® will improve cleaning over cleaning with the usual colorless liquid? |
